# Supplementary material
Source: MDPI journal article supplement (https://www.mdpi.com/2311-7524/9/5/607)
Supplement: s1 [file s1]

## Particle Size, Zeta-Potential and Polydispersity Coefficient of SLN-CA

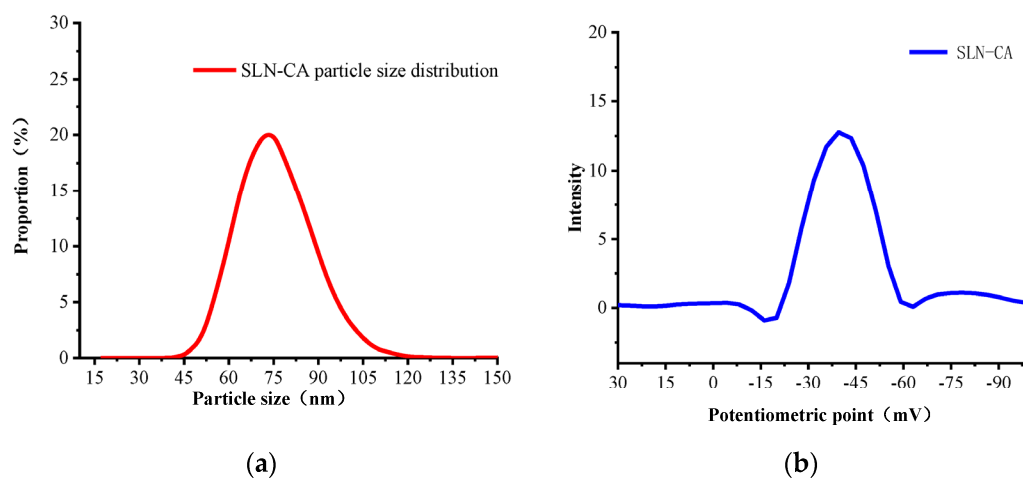

**Figure S1.** Results of particle size, zeta potential and polydispersity coefficient: (a) particle size and distribution; (b) zeta potential distribution.

## SEM and TEM of SLN-CA

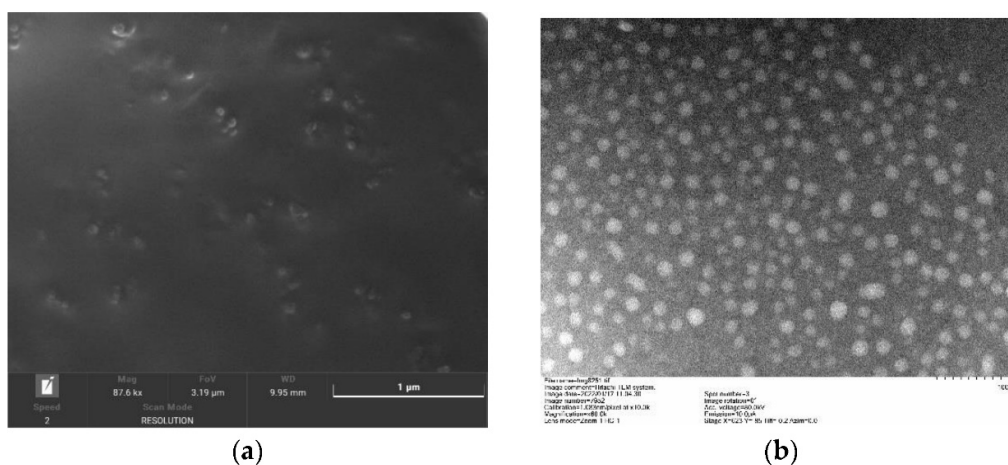

**Figure S2.** SLN-CA scanning electron microscope morphology (a), SLN-CA transmission electron microscope morphology (b).

**Table S1** Sensory characteristics of strawberries on the first of storage at 25°C.

|                          | Colour         | Appearance        | Scent             | Shape          | Overall acceptability |
|--------------------------|----------------|-------------------|-------------------|----------------|-----------------------|
| CA (16.6 $\mu$ L/mL)     | 9 $\pm$ 0 a    | 8.5 $\pm$ 0.82 b  | 5 $\pm$ 1.2 d     | 8 $\pm$ 1.22 b | 5.25 $\pm$ 0.7 c      |
| CA (1.05 $\mu$ L/mL)     | 9 $\pm$ 0 a    | 8.25 $\pm$ 0.43 b | 7.5 $\pm$ 0.5 b   | 9 $\pm$ 0 a    | 7 $\pm$ 0.7 b         |
| Control                  | 9 $\pm$ 0 a    | 9 $\pm$ 0 a       | 9 $\pm$ 0 a       | 9 $\pm$ 0 a    | 9 $\pm$ 0 a           |
| SLN-CA (16.6 $\mu$ L/mL) | 8 $\pm$ 0.7 b  | 9 $\pm$ 0 a       | 6.5 $\pm$ 1.11 c  | 9 $\pm$ 0 a    | 9 $\pm$ 0 a           |
| SLN-CA (8.3 $\mu$ L/mL)  | 8 $\pm$ 0.71 b | 9 $\pm$ 0 a       | 7.75 $\pm$ 0.82 b | 9 $\pm$ 0 a    | 9 $\pm$ 0 a           |
| SLN-CA (4.16 $\mu$ L/mL) | 9 $\pm$ 0 a    | 9 $\pm$ 0 a       | 9 $\pm$ 0 a       | 9 $\pm$ 0 a    | 9 $\pm$ 0 a           |
| SLN-CA (2.08 $\mu$ L/mL) | 9 $\pm$ 0 a    | 9 $\pm$ 0 a       | 9 $\pm$ 0 a       | 9 $\pm$ 0 a    | 9 $\pm$ 0 a           |
| SLN-CA (1.05 $\mu$ L/mL) | 9 $\pm$ 0 a    | 9 $\pm$ 0 a       | 9 $\pm$ 0 a       | 9 $\pm$ 0 a    | 9 $\pm$ 0 a           |

**Table S2.** Sensory characteristics of strawberries on seventh day (b) of storage at 25°C.

|                          | Colour            | Appearance        | Scent             | Shape             | Overall acceptability |
|--------------------------|-------------------|-------------------|-------------------|-------------------|-----------------------|
| control                  | 4.14 $\pm$ 1.2 b  | 4.57 $\pm$ 1.4 b  | 3.57 $\pm$ 0.5 c  | 5 $\pm$ 0.7 c     | 5.43 $\pm$ 1 c        |
| SLN-CA (16.6 $\mu$ L/mL) | 2.43 $\pm$ 0.5 a  | 3.42 $\pm$ 0.5 a  | 1.14 $\pm$ 0 a    | 2.57 $\pm$ 0.5 a  | 1.42 $\pm$ 0.8 a      |
| SLN-CA (8.3 $\mu$ L/mL)  | 4.14 $\pm$ 0.82 b | 7.28 $\pm$ 0.75 c | 2.41 $\pm$ 0.69 b | 4 $\pm$ 0.82 b    | 3.71 $\pm$ 0.47 b     |
| SLN-CA (4.16 $\mu$ L/mL) | 6.14 $\pm$ 0.47 c | 7.28 $\pm$ 0.69 c | 7.14 $\pm$ 0.58 e | 6.85 $\pm$ 0.47 d | 7.71 $\pm$ 0.47 d     |
| SLN-CA (2.08 $\mu$ L/mL) | 7.28 $\pm$ 0.45 d | 8 $\pm$ 0.53 c    | 7.57 $\pm$ 0.49 e | 8 $\pm$ 0.53 e    | 7.42 $\pm$ 0.73 d     |
| SLN-CA (1.04 $\mu$ L/mL) | 5.85 $\pm$ 0.64 c | 4.57 $\pm$ 0.73 b | 6 $\pm$ 0.76 d    | 3 $\pm$ 0.76 a    | 4.71 $\pm$ 0.7 c      |
